# Supplementary material for: Dual cascade nucleic acid recycling-amplified assembly of hyperbranched DNA nanostructures to construct a novel plasmonic colorimetric biosensing method
Source: Royal Society of Chemistry journal article supplement (doi:10.1039/d3an00689a), 2023-01-01
Supplement: d3an00689a1.pdf [file d3an00689a1.pdf]

Electronic Supplementary Information (ESI) for Analyst

This journal is (c) The Royal Society of Chemistry 2023

**Dual cascade nucleic acid recycling-amplified assembly of hyperbranched DNA nanostructures to construct a novel plasmonic colorimetric biosensing method**

Xinyue Yuwen,<sup>a</sup> Yingzhao Zeng,<sup>a</sup> Shilong Ruan,<sup>b</sup> Xin Li<sup>a</sup> and Guosong Lai<sup>\*a</sup>

<sup>a</sup> *Hubei Key Laboratory of Pollutant Analysis & Reuse Technology, College of Chemistry and Chemical Engineering, Hubei Normal University, Huangshi 435002, China*

<sup>b</sup> *Daye Public Inspection and Test Central, Daye 435100, China*

\* Corresponding author.

*E-mail address:* gslai@hbnu.edu.cn (G. Lai)

*Phone:* +86-714-6515602.

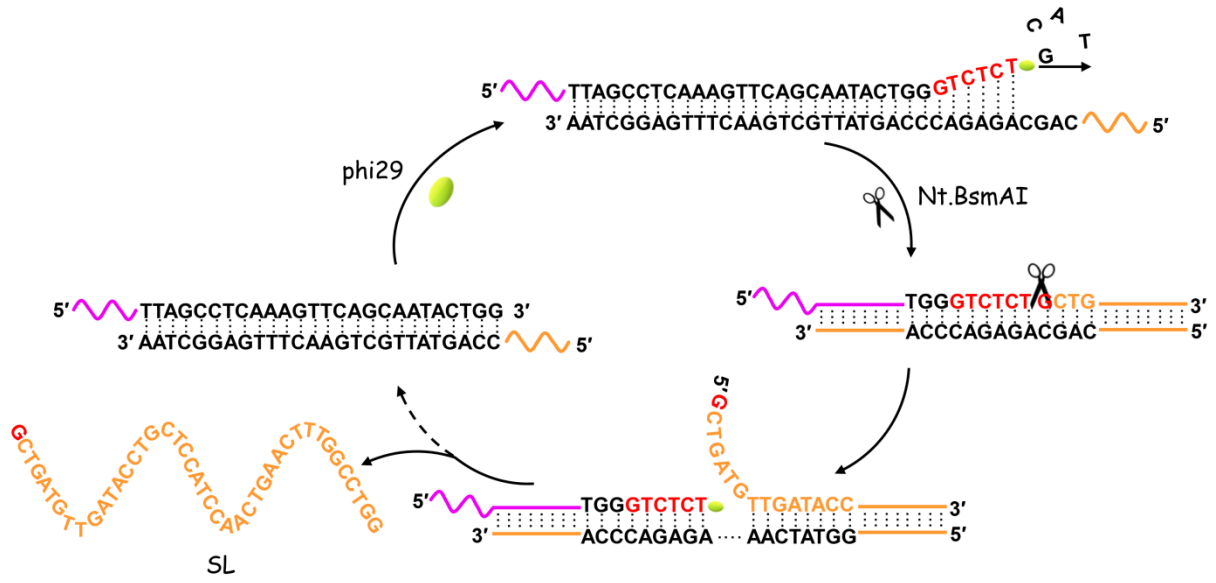

**Fig. S1** Schematic illustration of the working principle of the phi29-assisted cleavage reaction of Nt.BsmAI for releasing the SL strand.

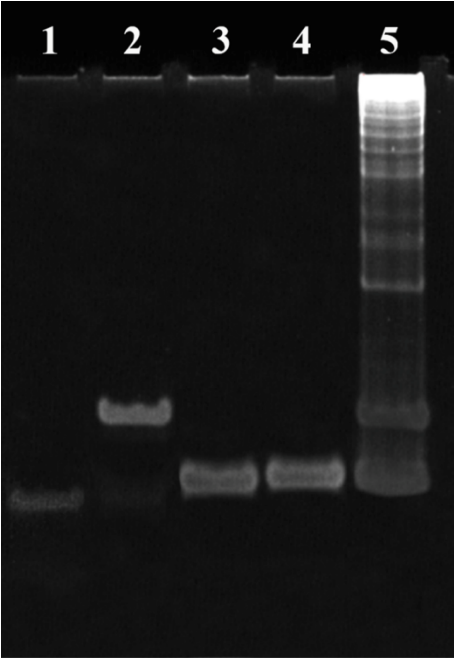

**Fig. S2** PAGE assay results of different samples: lane 1, SL; lane 2, SC + SL; lane 3, H4; lane 4, H5; lane 5, SC + SL + H4 + H5.

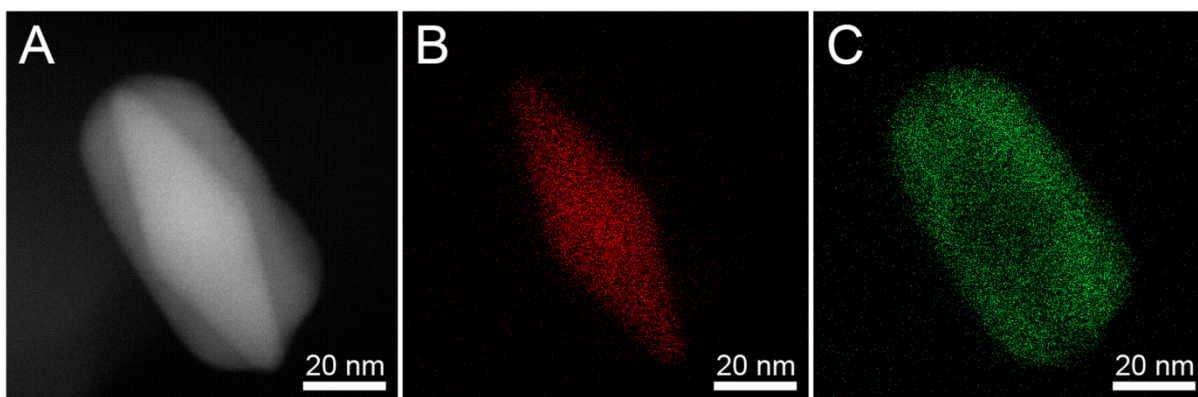

**Fig. S3** High-magnification HRTEM image of the typical Au NBP/Ag nanocomposite produced from the target biorecognition-induced silver deposition reaction (A), and its EDS mapping images of the gold (B) and silver (C) elements.

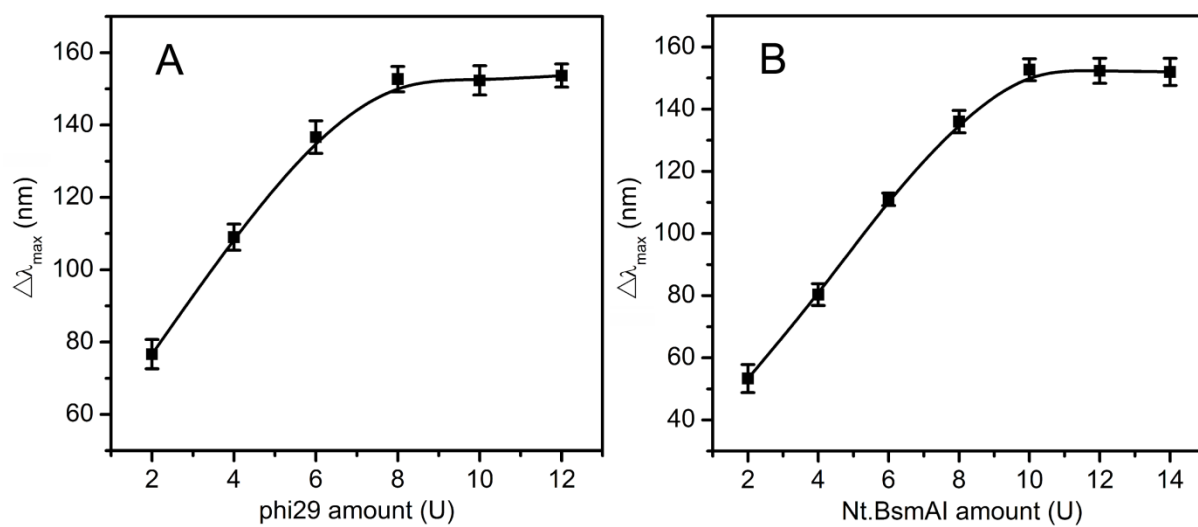

**Fig. S4** Effects of the amounts of (A) phi29 and (B) Nt.BsmAI on the  $\Delta\lambda_{\max}$  response induced by the target biorecognition reaction of 1 ng mL<sup>-1</sup> Kana.

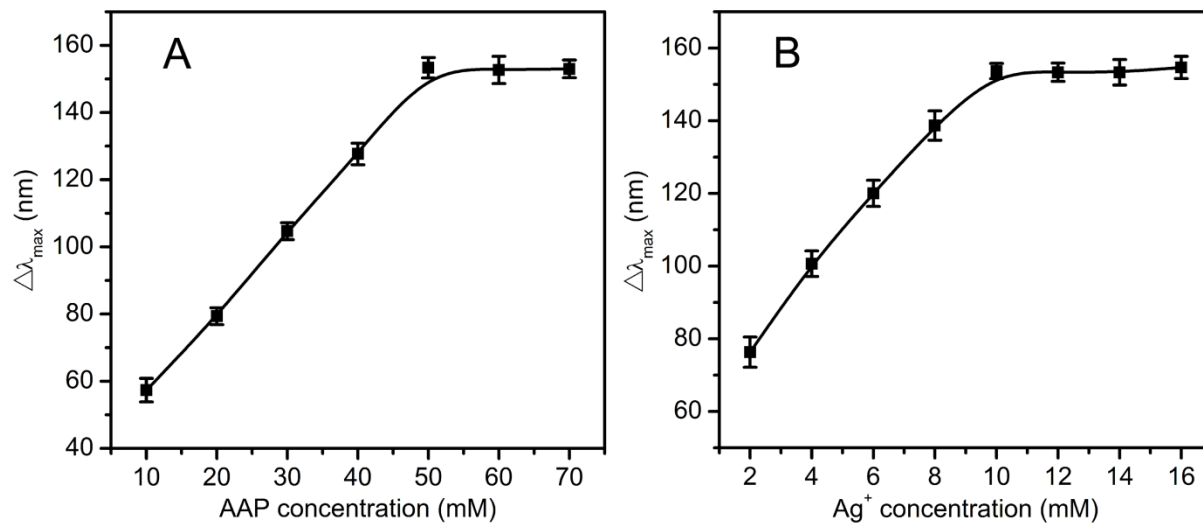

**Fig. S5** Effects of the concentrations of (A) AAP and (B)  $\text{Ag}^+$  on the  $\Delta\lambda_{\max}$  response induced by the target biorecognition reaction of  $1 \text{ ng mL}^{-1}$  Kana.

**Table S1.** The overview of the main characteristics and analytical performances of the proposed method to compare with the reference methods reported previously.

| Signal transduction strategy                                                                                        | Detection method | Detection time (min) | Linear range                                        | LOD                     | Ref.      |
|---------------------------------------------------------------------------------------------------------------------|------------------|----------------------|-----------------------------------------------------|-------------------------|-----------|
| Target biorecognition-triggered HCR to cause salt-induced aggregation of gold nanoparticles                         | Colorimetry      | 345                  | 1–40 $\mu\text{M}$                                  | 0.68 $\mu\text{M}$      | 15        |
| Target biorecognition-triggered catalytic hairpin assembly (CHA) and DNA walking to produce reverse signal change   | Fluorescence     | 205                  | 50 pM–<br>2 nM                                      | 21.7 pM                 | 28        |
| Target biorecognition-triggered CHA and HCR to yield branched DNA complexes with active G-quadruplex structures     | Fluorescence     | 145                  | 0.1–300 nM                                          | 46.1 pM                 | 32        |
| Target biorecognition-triggered assembly of G-quadruplex-decorated DNA nanotrees                                    | Colorimetry      | 165                  | 0.1 $\text{pg mL}^{-1}$ –<br>10 $\text{ng mL}^{-1}$ | 28 $\text{fg mL}^{-1}$  | 33        |
| Target biorecognition to release $\text{CoFe}_2\text{O}_4$ nanozymes from a methylene blue-based aptasensor         | Electrochemistry | 60                   | 1 pM–1 $\mu\text{M}$                                | 0.5 pM                  | 39        |
| DNase I-assisted target biorecognition recycling to desorb aptamer from graphene and output potentiometric signal   | Electrochemistry | 60                   | 0.05–30 pM                                          | 0.05 pM                 | 40        |
| Target biorecognition to inhibit the terminal deoxynucleotidyl transferase-amplified linking of enzyme labels       | Colorimetry      | 145                  | 0.01–500 nM                                         | 9 pM                    | 41        |
| Target biorecognition-triggered assembly of hyperbranched DNA nanostructures to induce silver deposition at Au NBPs | Colorimetry      | 300                  | 10 $\text{fg mL}^{-1}$ –<br>1 $\text{ng mL}^{-1}$   | 1.4 $\text{fg mL}^{-1}$ | This work |

**Table S2** The results on the recovery tests of Kana added in a milk and a honey sample by this method and the ELISA kit (n=5).

| Sample | Add<br>(pg mL <sup>-1</sup> ) | Found<br>(pg mL <sup>-1</sup> , ± SD) | Recovery<br>(%) | ELISA<br>(ng mL <sup>-1</sup> , ± SD) | Recovery<br>(%) |
|--------|-------------------------------|---------------------------------------|-----------------|---------------------------------------|-----------------|
| Milk   | 1                             | 1.056±0.024                           | 105.6           | NA                                    | /               |
|        | 10                            | 10.32±0.23                            | 103.2           | NA                                    | /               |
|        | 100                           | 99.27±2.4                             | 99.3            | 96.44±5.6                             | 96.44           |
|        | 500                           | 509.4±20                              | 101.9           | 512.0±19                              | 102.4           |
| Honey  | 1                             | 0.9591±0.033                          | 95.9            | NA                                    | /               |
|        | 10                            | 10.28±0.33                            | 102.8           | NA                                    | /               |
|        | 100                           | 104.2±2.6                             | 104.2           | 98.94±6.4                             | 98.94           |
|        | 500                           | 493.2±14                              | 98.6            | 527.6±17                              | 105.5           |
